# Supplementary material for: A Mendelian randomization study on the causal effects of dietary components on arterial stiffness
Source: Research Square preprint supplement (doi:10.21203/rs.3.rs-5819129/v1), 2025-01-20
Supplement: Supplementary file 1 [file cd33ed559c7e9501c86690f8.xlsx]

## Sheet: Sheet1
Exposure		Outcome	Methods		β	95% CI	P
Wheat products		Arterial stiffness index	IVW		-2.04388	[-2.724; -1.364]	3.8681e-09
			MR‐Egger		-0.988464	[-2.783; 0.806]	0.359347
			Weighted median		-2.17295	[-2.989; -1.357]	1.77841e-07
			Weighted mode		-1.42825	[-2.302; -0.554]	0.0328353
Pork			IVW		0.30638	[0.077; 0.536]	0.009
			MR‐Egger		1.34268	[-0.235; 2.920]	0.121
			Weighted median		0.266678	[-0.053; 0.586]	0.102
			Weighted mode		0.29805	[-0.272; 0.826]	0.325
Lamb/mutton			IVW		0.234671	[0.082; 0.388]	0.003
			MR‐Egger		0.332712	[-0.304; 0.970]	0.314
			Weighted median		0.249139	[0.037; 0.970]	0.02
			Weighted mode		0.12723	[-0.277; 0.531]	0.541
Sugar			IVW		-0.212739	[-0.564; 0.138]	0.235
			MR‐Egger		-1.11267	[-3.116; 0.890]	0.29
			Weighted median		-0.299936	[-0.782; 0.182]	0.223
			Weighted mode		-0.449475	[-1.333; 0.434]	0.331
